# Supplementary material
Source: Springer Nature journal article supplement (https://www.springermedizin.de/resource/supplementary/12889_2005_431_MOESM1_ESM.pdf/9500862)
Supplement: MOESM1 [file 9500862]

299 South Asians with Type 2 diabetes in Glasgow

4 died  
33 refused to participate  
61 moved away  
83 unavailable (due to closure of a day care centre)

118 randomized (by gender, literacy)

29 Whites with Type 2 diabetes in GP practice

2 died

27 (White) assigned to "Comparison" (routine care) Not Randomized

59 assigned to "Intervention" (receiving extra diabetes education)

59 (South Asians) assigned to "Control" (routine care)

2 died  
2 hospitalized  
2 refused to participate

2 died  
10 back home (unavailable)  
3 refused to participate

2 died  
15 unavailable  
4 refused to participate  
2 hospitalized

44 completed six months questionnaire

36 completed six months questionnaire

21 completed six months questionnaire
